# Supplementary material for: Therapeutic Vaccination with TNF-Kinoid in TNF Antagonist-Resistant Rheumatoid Arthritis: A Phase II Randomized, Controlled Clinical Trial
Source: PubMed Central journal article supplement (PMC4269456; doi:10.1371/journal.pone.0113465), 2014-12-17
Supplement: pone.0113465.s002.pdf [file pone.0113465.s002.pdf]

Table S1. Anti-TNF antibody Titers. Individual anti-TNF antibody titers (Dil-1)

| 90µg D0-28    | Visit | Day | Kinoid group |           |               |       | Placebo group |           |               |       |
|---------------|-------|-----|--------------|-----------|---------------|-------|---------------|-----------|---------------|-------|
|               |       |     | 10204        | 20101     | 80302         | 10202 |               |           |               |       |
|               | V2    | 0   | 100          | 100       | 100           | 100   |               |           |               |       |
|               | V4    | 17  | 100          | 100       | 100           | 100   |               |           |               |       |
|               | V5    | 28  | 200          | 100       | 100           | 100   |               |           |               |       |
|               | V6    | 38  | 800          | 100       | 100           | 100   |               |           |               |       |
|               | V7    | 56  | 3200         | 100       | 200           | 100   |               |           |               |       |
|               | V8    | 84  | 800          | 100       | 100           | 100   |               |           |               |       |
|               | V9    | 112 | 800          | 100       | 100           |       |               |           |               |       |
|               | V10   | 140 | 400          | 100       | 100           |       |               |           |               |       |
|               | V11   | 168 | 200          | 100       | 100           |       |               |           |               |       |
|               | V12   | 252 | 200          | 100       | 100           |       |               |           |               |       |
|               | V13   | 336 | 100          | 100       | 100           |       |               |           |               |       |
| 90µg D0-7-28  | Visit | Day | Kinoid group |           |               |       | Placebo group |           |               |       |
|               |       |     | 10205        | 80102     | 80103         | 10208 |               |           |               |       |
|               | V2    | 0   | 100          | 100       | 100           | 100   |               |           |               |       |
|               | V4    | 17  | 100          | 800       | 100           | 100   |               |           |               |       |
|               | V5    | 28  | 100          | 1600      | 100           | 100   |               |           |               |       |
|               | V6    | 38  | 100          | 800       | 100           | 100   |               |           |               |       |
|               | V7    | 56  | 100          | 800       | 100           | 100   |               |           |               |       |
|               | V8    | 84  | 100          | no sample | 100           | 100   |               |           |               |       |
|               | V9    | 112 | 100          | 400       | 100           |       |               |           |               |       |
|               | V10   | 140 | 100          | 200       | 100           |       |               |           |               |       |
|               | V11   | 168 | 100          | 12800     | 100           |       |               |           |               |       |
|               | V12   | 252 | 100          | 800       | 100           |       |               |           |               |       |
|               | V13   | 336 | 100          | 200       | 100           |       |               |           |               |       |
| 180µg D0-28   | Visit | Day | Kinoid group |           | Placebo group |       | Kinoid group  |           | Placebo group |       |
|               |       |     | 10207        | 10301     | 30301         | 60103 | 60201         | 70402     | 10206         | 20501 |
|               | V2    | 0   | 3200         | 100       | 100           | 100   | 100           | 100       | 100           | 100   |
|               | V4    | 17  | 800          | 100       | 100           | 100   | 100           | 100       | 100           | 100   |
|               | V5    | 28  | 400          | 100       | 100           | 100   | 100           | 200       | 100           | 100   |
|               | V6    | 38  | 400          | 100       | 400           | 100   | 100           | 400       | 100           | 100   |
|               | V7    | 56  | 200          | 100       | 400           | 100   | 100           | 100       | 100           | 100   |
|               | V8    | 84  | 100          | 100       | 200           | 100   | 100           | 100       | 100           | 100   |
|               | V9    | 112 | 200          | 100       | 100           | 100   | 100           |           |               |       |
|               | V10   | 140 | 200          | 100       | 100           |       | 100           |           |               |       |
|               | V11   | 168 | 200          | 100       | 100           |       | 100           |           |               |       |
|               | V12   | 252 | 200          | 100       | 100           |       | 100           |           |               |       |
|               | V13   | 336 | 200          | 100       | 100           |       | 100           |           |               |       |
| 180µg D0-7-28 | Visit | Day | Kinoid group |           | Placebo group |       | Kinoid group  |           | Placebo group |       |
|               |       |     | 10302        | 60501     | 70103         | 80101 | 80104         | 80106     | 60102*        | 80105 |
|               | V2    | 0   | 100          | 100       | 800           | 100   | 400           | 100       | 100           | 200   |
|               | V4    | 17  | 100          | 100       | 100           | 100   | 100           | 100       | 100           | 100   |
|               | V5    | 28  | 100          | 100       | 400           | 100   | 200           | 100       | 100           | 100   |
|               | V6    | 38  | 400          | 100       | 800           | 100   | 400           | 100       | 100           | 100   |
|               | V7    | 56  | 200          | 100       | 800           | 200   | 200           | 100       | 100           | 100   |
|               | V8    | 84  |              | 100       | 400           | 200   | 200           | 100       | 100           | 100   |
|               | V9    | 112 |              | 100       | 400           | 100   | 1600          | 100       | 200           |       |
|               | V10   | 140 |              | 100       | 800           | 100   | 1600          | 100       | 200           |       |
|               | V11   | 168 |              | 100       | 100           | 100   | 800           | 100       | 200           |       |
|               | V12   | 252 |              | 100       | 100           | 100   | 1600          | 100       | 200           |       |
|               | V13   | 336 |              | 100       | 100           | 100   | 1600          | 100       | 200           |       |
| 360µg D0-28   | Visit | Day | Kinoid group |           | Placebo group |       | Kinoid group  |           | Placebo group |       |
|               |       |     | 10209        | 30303     | 50201         | 50304 | 50602         | 70104     | 21102         | 30701 |
|               | V2    | 0   | 100          | 100       | 100           | 1600  | 100           | 100       | 100           | 100   |
|               | V4    | 17  | 100          | 100       | 100           | 800   | 400           | 100       | 100           | 100   |
|               | V5    | 28  | 400          | 100       | 400           | 800   | 800           | 100       | 100           | 100   |
|               | V6    | 38  | 800          | 400       | 800           | 800   | 1600          | 400       | 100           | 100   |
|               | V7    | 56  | 400          | 400       | 3200          | 1600  | 1600          | 200       | 100           | 100   |
|               | V8    | 84  | 200          | 200       | 6400          | 3200  | 1600          | 100       | 100           | 100   |
|               | V9    | 112 | 200          | 400       | 12800         | 1600  | 1600          | 100       |               |       |
|               | V10   | 140 |              | 400       | 6400          | 800   |               |           |               |       |
|               | V11   | 168 |              | 400       | 3200          | 800   |               |           |               |       |
|               | V12   | 252 |              | 400       | 3200          | 400   |               |           |               |       |
|               | V13   | 336 |              | 400       | 3200          | 200   |               |           |               |       |
| 360µg D0-7-28 | Visit | Day | Kinoid group |           | Placebo group |       | Kinoid group  |           | Placebo group |       |
|               |       |     | 30302        | 50301     | 50601         | 80109 | 80111         | 80305     | 50303         | 50603 |
|               | V2    | 0   | 100          | 100       | 100           | 100   | 100           | 800       | 100           | 100   |
|               | V4    | 17  | 100          | 400       | 1600          | 100   | 100           | 200       | 100           | 100   |
|               | V5    | 28  | 100          | 6400      | 6400          | 800   | 100           | 800       | 100           | 100   |
|               | V6    | 38  | 1600         | 6400      | 12800         | 800   | 100           | no sample | 100           | 100   |
|               | V7    | 56  | 1600         | 3200      | 6400          | 1600  | 200           | 800       | 100           | 100   |
|               | V8    | 84  | 800          | 1600      | 6400          | 3200  | 200           |           | 100           | 100   |
|               | V9    | 112 | 800          | 1600      | 12800         | 12800 | 200           |           |               |       |
|               | V10   | 140 | 800          | 1600      | 6400          | 6400  | 100           |           |               |       |
|               | V11   | 168 | 800          | 800       | 6400          | 6400  | 100           |           |               |       |
|               | V12   | 252 | 400          | 400       | 3200          | 6400  | 100           |           |               |       |
|               | V13   | 336 | 400          | 100       | 3200          | 3200  | 100           |           |               |       |

60102 \* : Patient injected with kinoid at V4 and V5 whereas randomized in Placebo group
