# Supplementary material for: Therapeutic Vaccination with TNF-Kinoid in TNF Antagonist-Resistant Rheumatoid Arthritis: A Phase II Randomized, Controlled Clinical Trial
Source: PubMed Central journal article supplement (PMC4269456; doi:10.1371/journal.pone.0113465), 2014-12-17
Supplement: pone.0113465.s003.pdf [file pone.0113465.s003.pdf]

**Durez P et al;** Therapeutic vaccination with TNF-Kinoid in TNF antagonist-resistant rheumatoid arthritis: a phase II randomized, controlled clinical trial.

**Table S2: Results summary of Neutralization Capacity**

| Patient # | Trial group | NC50 results (dil-1) |         |         |
|-----------|-------------|----------------------|---------|---------|
|           |             | D0/V2*               | D17/V4* | D56/V7* |
| #010204   | TNF-K 90µg  | <100                 | -       | <100    |
| #080102   | TNF-K 90µg  | <100                 | -       | <100    |
| #080302   | TNF-K 90µg  | <100                 | -       | <100    |
| #010302   | TNF-K 180µg | <100                 | -       | <100    |
| #030301   | TNF-K 180µg | <100                 | -       | <100    |
| #060102   | TNF-K 180µg | <100                 | -       | <100    |
| #060103   | TNF-K 180µg | <100                 | -       | <100    |
| #060501   | TNF-K 180µg | <100                 | -       | <100    |
| #070103   | TNF-K 180µg | 438.54               | <100    | <100    |
| #080101   | TNF-K 180µg | <100                 | -       | <100    |
| #080104   | TNF-K 180µg | <100                 | <100    | <100    |
| #080106   | TNF-K 180µg | <100                 | -       | <100    |
| #010209   | TNF-K 360µg | <100                 | -       | <100    |
| #030302   | TNF-K 360µg | <100                 | -       | <100    |
| #030303   | TNF-K 360µg | <100                 | -       | <100    |
| #050201   | TNF-K 360µg | <100                 | -       | <100    |
| #050301   | TNF-K 360µg | <100                 | -       | <100    |
| #050601   | TNF-K 360µg | <100                 | -       | <100    |
| #050602   | TNF-K 360µg | <100                 | -       | <100    |
| #070104   | TNF-K 360µg | <100                 | -       | <100    |
| #080109   | TNF-K 360µg | <100                 | -       | <100    |
| #080305   | TNF-K 360µg | <100                 | <100    | <100    |

\* Day of sampling / Visit number      - : Not tested
