# Supplementary material for: Therapeutic Vaccination with TNF-Kinoid in TNF Antagonist-Resistant Rheumatoid Arthritis: A Phase II Randomized, Controlled Clinical Trial
Source: PubMed Central journal article supplement (PMC4269456; doi:10.1371/journal.pone.0113465), 2014-12-17
Supplement: pone.0113465.s004.pdf [file pone.0113465.s004.pdf]

Durez P et al; Therapeutic vaccination with TNF-Kinoid in TNF antagonist-resistant rheumatoid arthritis: a phase II randomized, controlled clinical trial.

**Table S3. Lymphoproliferation assay.** Stimulation index of patient PBMCs stimulated with TNF-Kinoid, TNF and KLH at 0.1, 1 and 10 µg/ml.

| Subject  | Period* | Stimuli        |      |      |             |     |     |             |     |      |
|----------|---------|----------------|------|------|-------------|-----|-----|-------------|-----|------|
|          |         | Kinoid (µg/ml) |      |      | TNF (µg/ml) |     |     | KLH (µg/ml) |     |      |
|          |         | 0.1            | 1    | 10   | 0.1         | 1   | 10  | 0.1         | 1   | 10   |
| 01-02-02 | D0/V2   | 1,6            | 2,1  | 4,0  | 2,5         | 2,2 | 1,6 | 2,0         | 1,7 | 1,4  |
| 01-02-02 | D56/V7  | 1,5            | 2,0  | 3,1  | 2,0         | 1,8 | 1,3 | 1,4         | 1,8 | 1,3  |
| 01-02-04 | D0/V2   | 1,4            | 2,4  | 2,3  | 2,0         | 2,3 | 1,8 | 1,7         | 1,4 | 1,1  |
| 01-02-04 | D56/V7  | 7,2            | 13,2 | 14,1 | 2,6         | 2,7 | 2,9 | 3,2         | 4,9 | 13,3 |
| 01-02-05 | D0/V2   | 1,0            | 0,4  | 0,4  | 0,4         | 0,3 | 0,3 | 0,4         | 0,4 | 0,4  |
| 01-02-05 | D56/V7  | 1,3            | 1,9  | 2,0  | 1,2         | 1,0 | 0,9 | 0,6         | 1,3 | 0,9  |
| 01-02-06 | D0/V2   | 1,0            | 1,0  | 1,1  | 1,2         | 1,1 | 1,2 | 1,2         | 1,0 | 0,9  |
| 01-02-06 | D56/V7  | 1,1            | 0,9  | 1,0  | 1,1         | 0,8 | 0,9 | 1,0         | 1,1 | 1,1  |
| 01-02-07 | D0/V2   | 1,1            | 1,5  | 1,8  | 1,3         | 1,1 | 1,3 | 1,0         | 1,3 | 1,1  |
| 01-02-07 | D56/V7  | 3,0            | 9,1  | 16,8 | 1,0         | 1,0 | 0,9 | 0,9         | 1,7 | 4,0  |
| 01-02-08 | D0/V2   | 1,2            | 1,2  | 1,6  | 1,1         | 1,1 | 1,1 | 1,0         | 0,9 | 1,0  |
| 01-02-08 | D56/V7  | 1,0            | 1,3  | 1,9  | 1,3         | 1,3 | 1,1 | 0,9         | 1,1 | 1,3  |
| 01-02-09 | D0/V2   | 0,6            | 1,0  | 1,8  | 1,2         | 1,3 | 1,7 | 1,1         | 1,1 | 1,2  |
| 01-02-09 | D56/V7  | 1,4            | 4,0  | 13,1 | 1,1         | 1,4 | 1,3 | 1,1         | 1,5 | 2,0  |
| 01-03-01 | D0/V2   | 1,9            | 2,8  | 2,2  | 1,0         | 1,0 | 2,6 | 1,1         | 0,9 | 0,6  |
| 01-03-01 | D56/V7  | 1,5            | 2,5  | 2,8  | 1,3         | 1,6 | 1,7 | 1,9         | 1,2 | 2,3  |
| 01-03-02 | D0/V2   | 1,2            | 2,1  | 3,9  | 2,0         | 1,5 | 1,3 | 1,6         | 1,4 | 1,3  |
| 01-03-02 | D56/V7  | 9,2            | 21,7 | 30,3 | 2,1         | 1,6 | 1,6 | 1,6         | 2,6 | 7,6  |
| 02-01-01 | D0/V2   | 1,4            | 1,5  | 2,7  | 2,9         | 2,0 | 1,8 | 2,0         | 2,5 | 3,3  |
| 02-01-01 | D56/V7  | 1,7            | 2,7  | 5,0  | 1,3         | 0,9 | 1,0 | 1,4         | 2,0 | 2,7  |
| 02-05-01 | D0/V2   | 0,9            | 1,0  | 2,3  | 1,1         | 1,1 | 1,5 | 1,6         | 1,3 | 1,0  |
| 02-05-01 | D56/V7  | 0,8            | 1,3  | 2,4  | 1,8         | 1,5 | 1,9 | 1,7         | 1,7 | 2,2  |
| 02-11-02 | D0/V2   | 1,0            | 0,6  | 1,2  | 1,2         | 1,0 | 1,0 | 1,3         | 0,5 | 1,6  |
| 02-11-02 | D56/V7  | 0,7            | 1,3  | 1,9  | 1,8         | 1,2 | 1,8 | 1,3         | 2,0 | 1,3  |
| 03-03-01 | D0/V2   | 1,6            | 2,8  | 5,6  | 3,9         | 4,4 | 2,1 | 1,8         | 2,4 | 1,5  |
| 03-03-01 | D56/V7  | 6,7            | 22,3 | 36,5 | 2,3         | 2,2 | 1,0 | 1,8         | 2,9 | 12,2 |
| 03-03-02 | D0/V2   | 1,0            | 1,2  | 2,3  | 1,5         | 1,0 | 1,0 | 1,3         | 1,4 | 1,3  |
| 03-03-02 | D56/V7  | 7,5            | 21,8 | 29,6 | 1,8         | 1,4 | 1,2 | 1,8         | 4,8 | 11,8 |
| 03-03-03 | D0/V2   | 1,1            | 1,7  | 2,5  | 1,4         | 1,1 | 1,0 | 1,1         | 1,1 | 1,7  |
| 03-03-03 | D56/V7  | 3,4            | 7,9  | 18,0 | 2,1         | 2,1 | 1,5 | 2,4         | 2,1 | 2,6  |
| 03-07-01 | D0/V2   | 0,8            | 1,4  | 2,3  | 0,9         | 0,9 | 1,0 | 0,9         | 1,2 | 0,9  |
| 03-07-01 | D56/V7  | 1,0            | 0,7  | 1,3  | 1,3         | 1,6 | 1,6 | 1,3         | 1,5 | 0,9  |

\*Day of sampling/Visit number. In gray, placebo patients.
